# Supplementary material for: Establish a novel tumor budding-related signature to predict prognosis and guide clinical therapy in colorectal cancer
Source: Springer Nature journal article supplement (doi:10.1038/s41598-024-52596-1), 2024-01-25
Supplement: MOESM1 [file 41598_2024_52596_MOESM1_ESM.pdf]

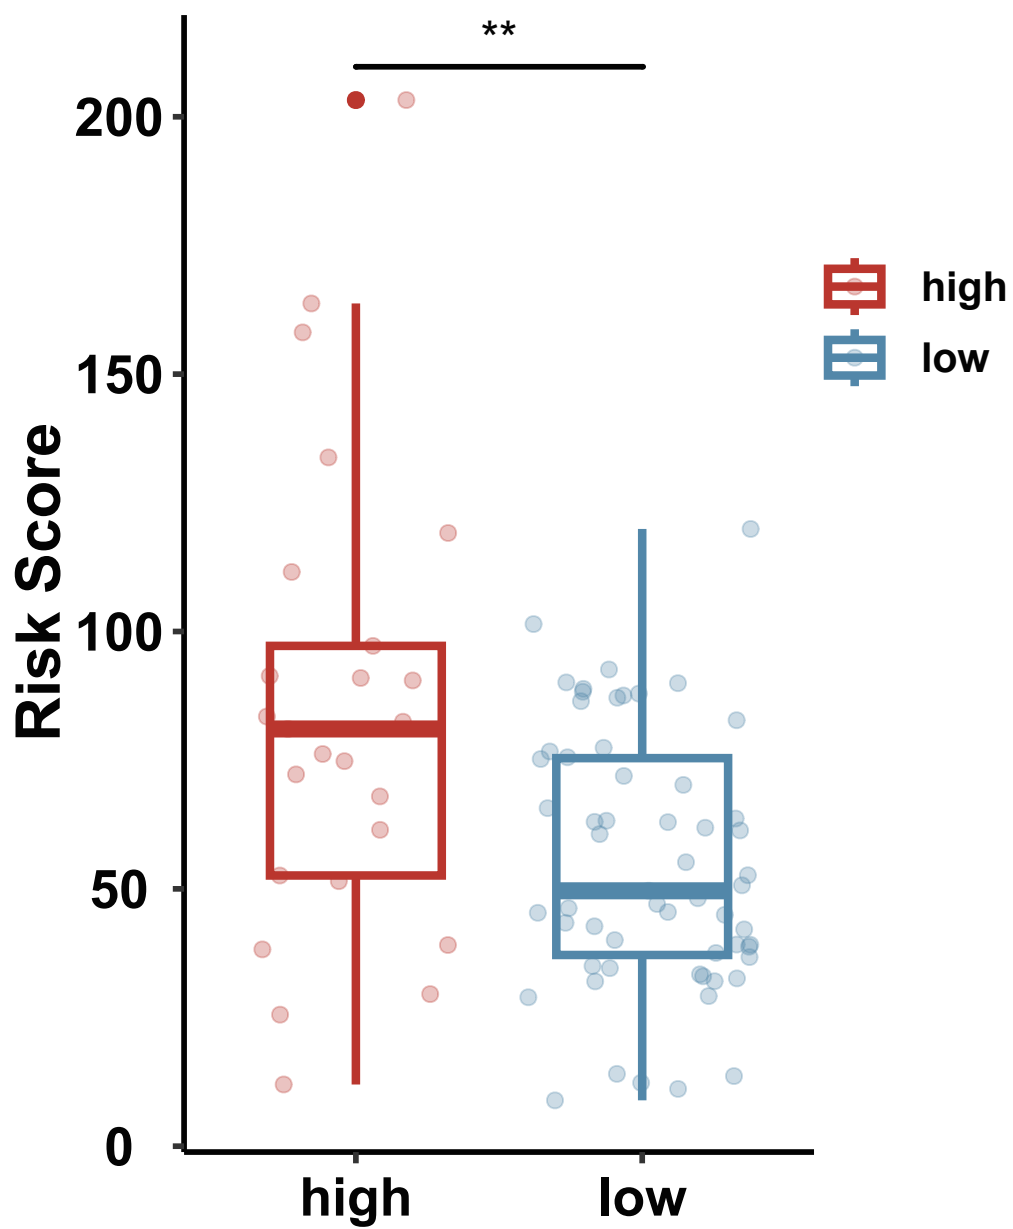

Figure S1. Risk scores for budding of high-grade and low-grade tumors
